# Supplementary material
Source: HighWire-hosted journal article supplement (https://www.jneurosci.org/highwire/filestream/601101/field_highwire_adjunct_files/0/Supplemental_Figures.pdf)

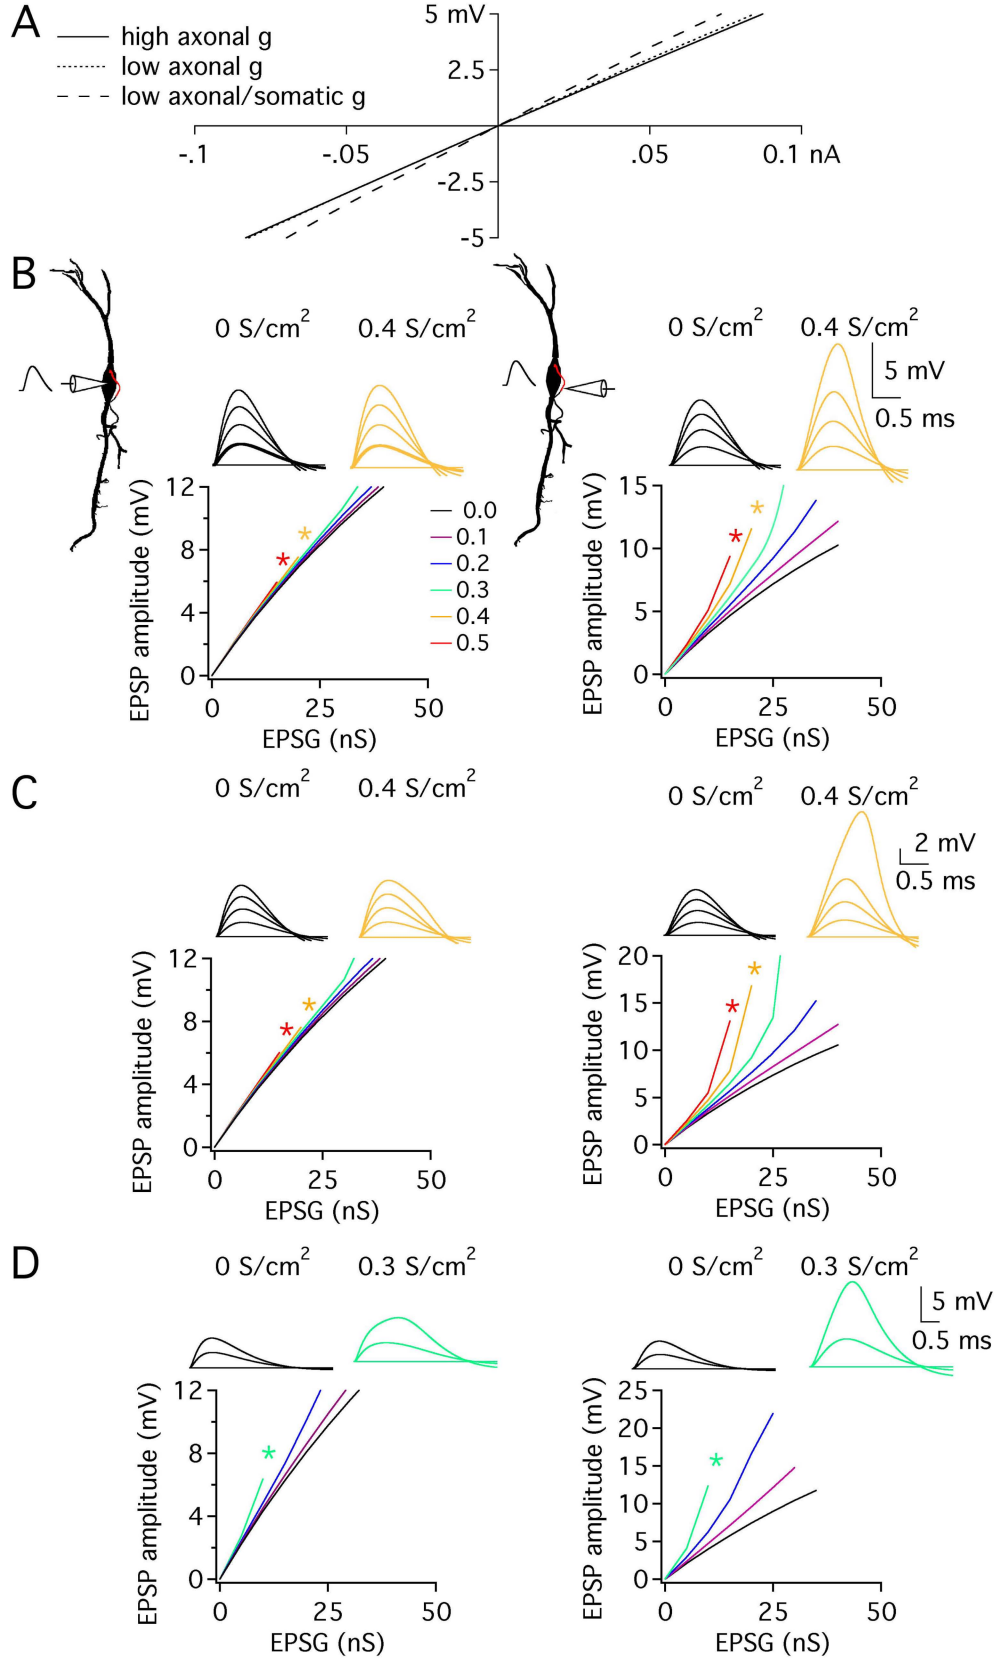

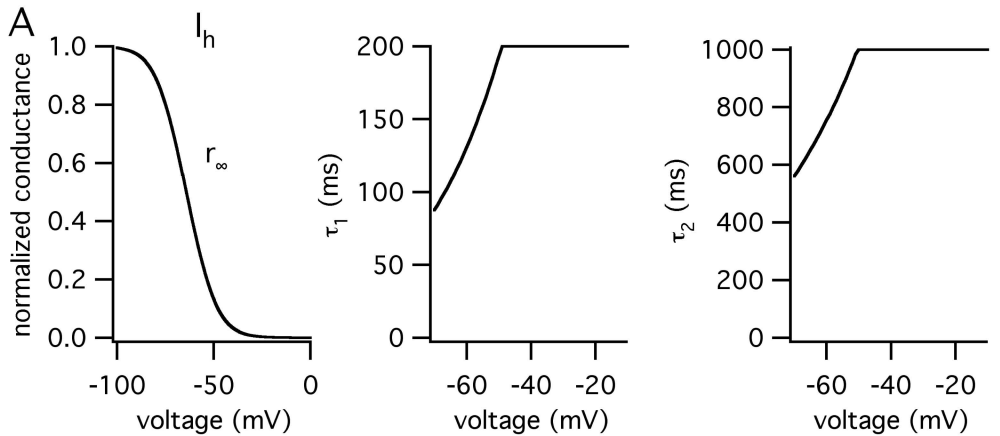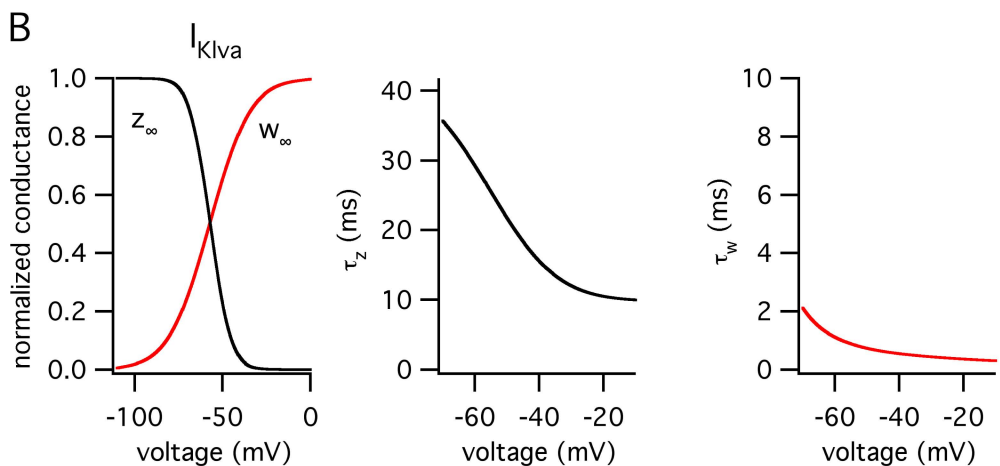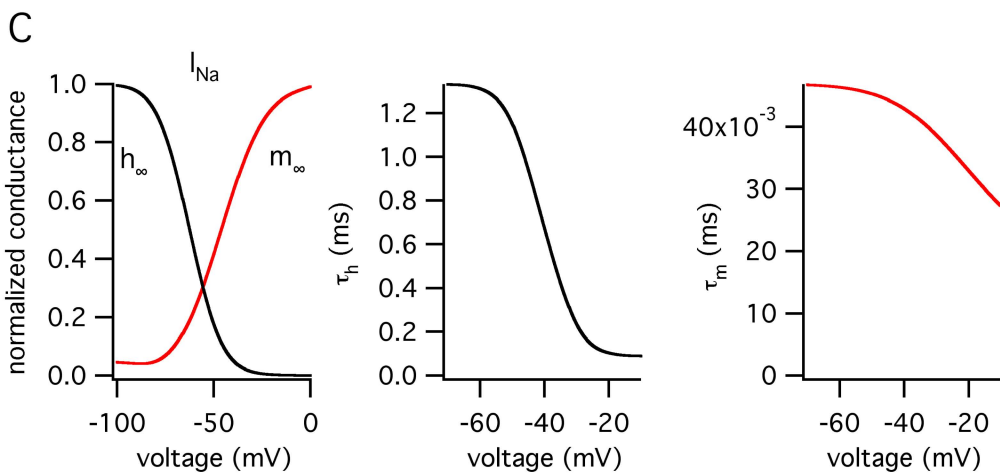

Supplement: Supplemental_Figures.pdf [file Supplemental_Figures.pdf]
